# Supplementary material for: Synthesis, Characterization, and Biological Properties of the Copper(II) Complexes with Novel Ligand: N-[4-({2-[1-(pyridin-2-yl)ethylidene]hydrazinecarbothioyl}amino)phenyl]acetamide
Source: MDPI journal article supplement (doi:10.3390/inorganics11100408), 2023-10-16
Supplement: s1 [file s1]

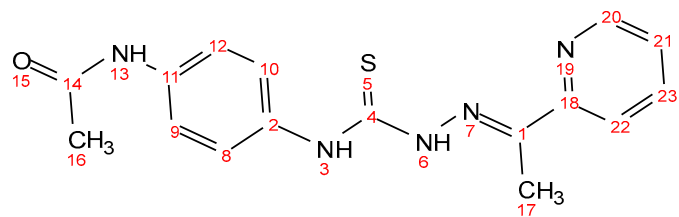

$^1\text{H}$  NMR (400 MHz, DMSO- $d_6$ )  $\delta$  8.59 (d,  $J$  = 4.7 Hz, 1H), 8.53 (d,  $J$  = 8.1 Hz, 1H), 7.85 – 7.78 (m, 1H), 7.57 (d,  $J$  = 8.8 Hz, 2H), 7.41 (dd,  $J$  = 10.5, 6.0 Hz, 3H).

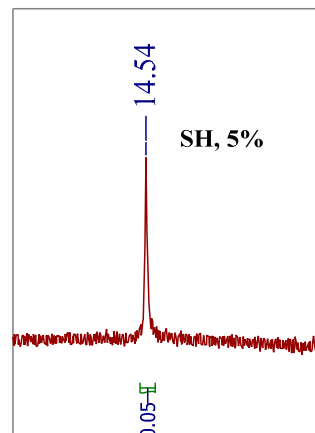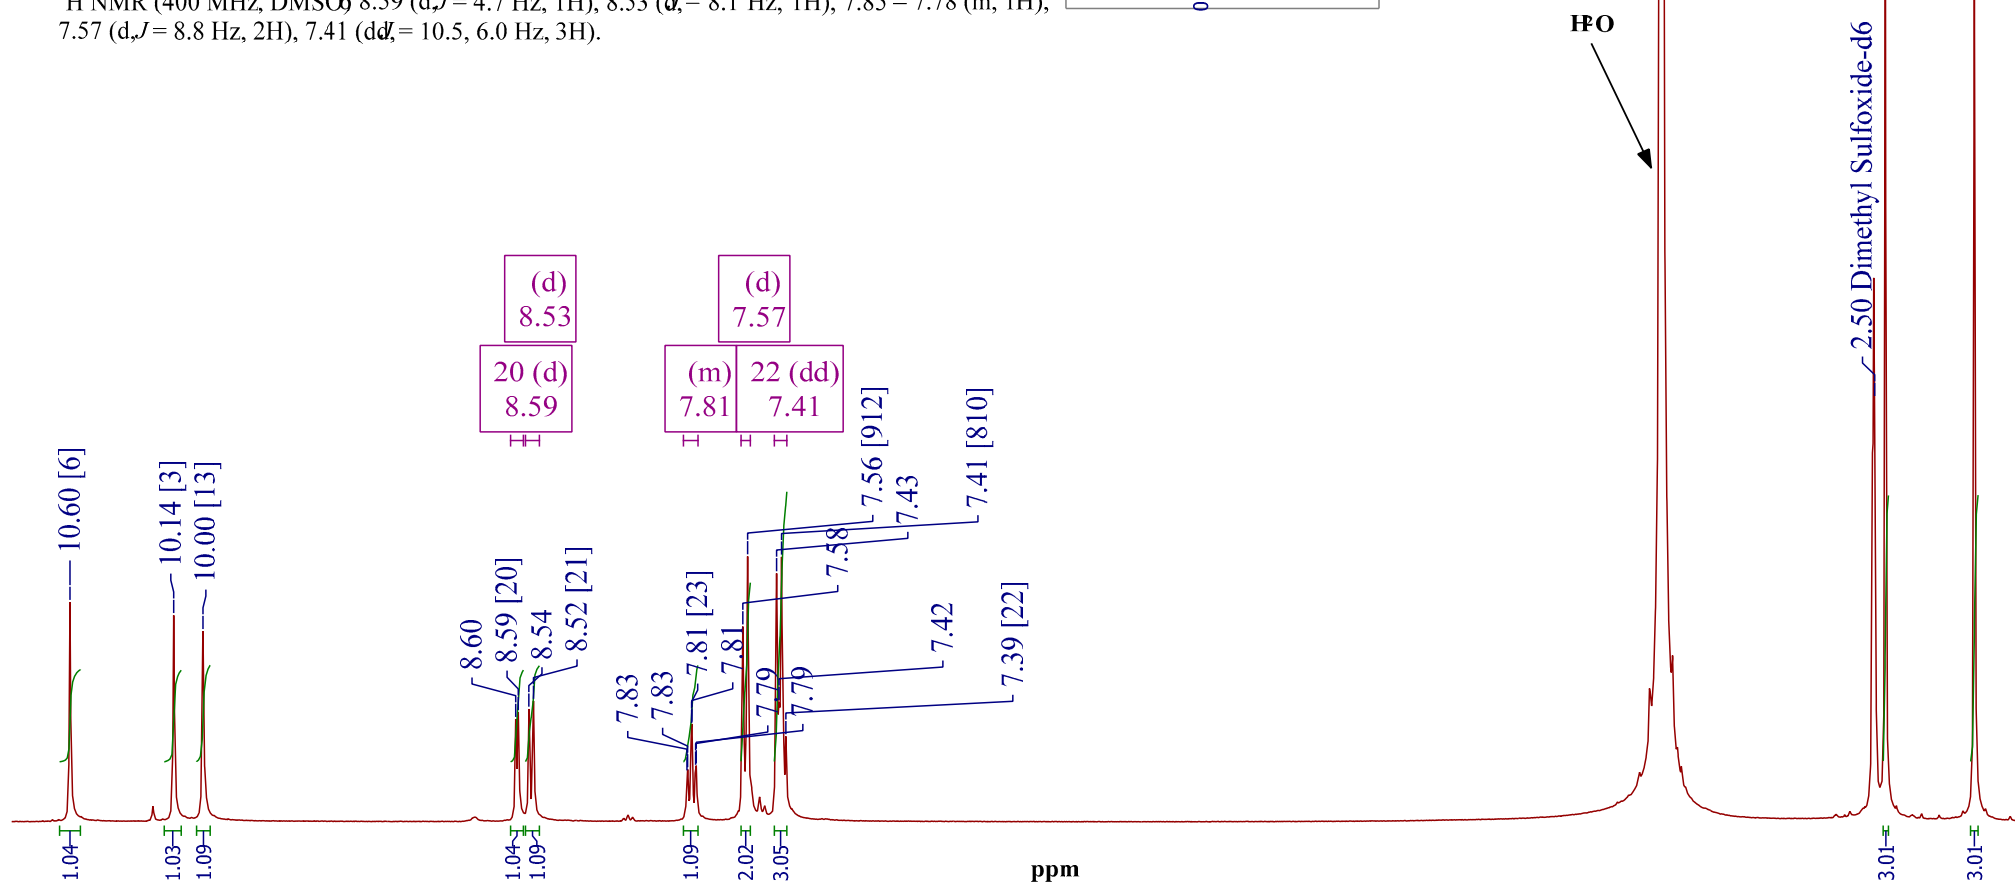

Figure S1.  $^1\text{H}$ -NMR spectrum of thiosemicarbazone HL

$^{13}\text{C}$  NMR (101 MHz, DMSO) 177.82, 168.79, 154.95, 149.50, 148.93, 137.36, 136.91, 134.56, 127.14, 124.60, 121.73, 119.14, 24.41, 12.91.

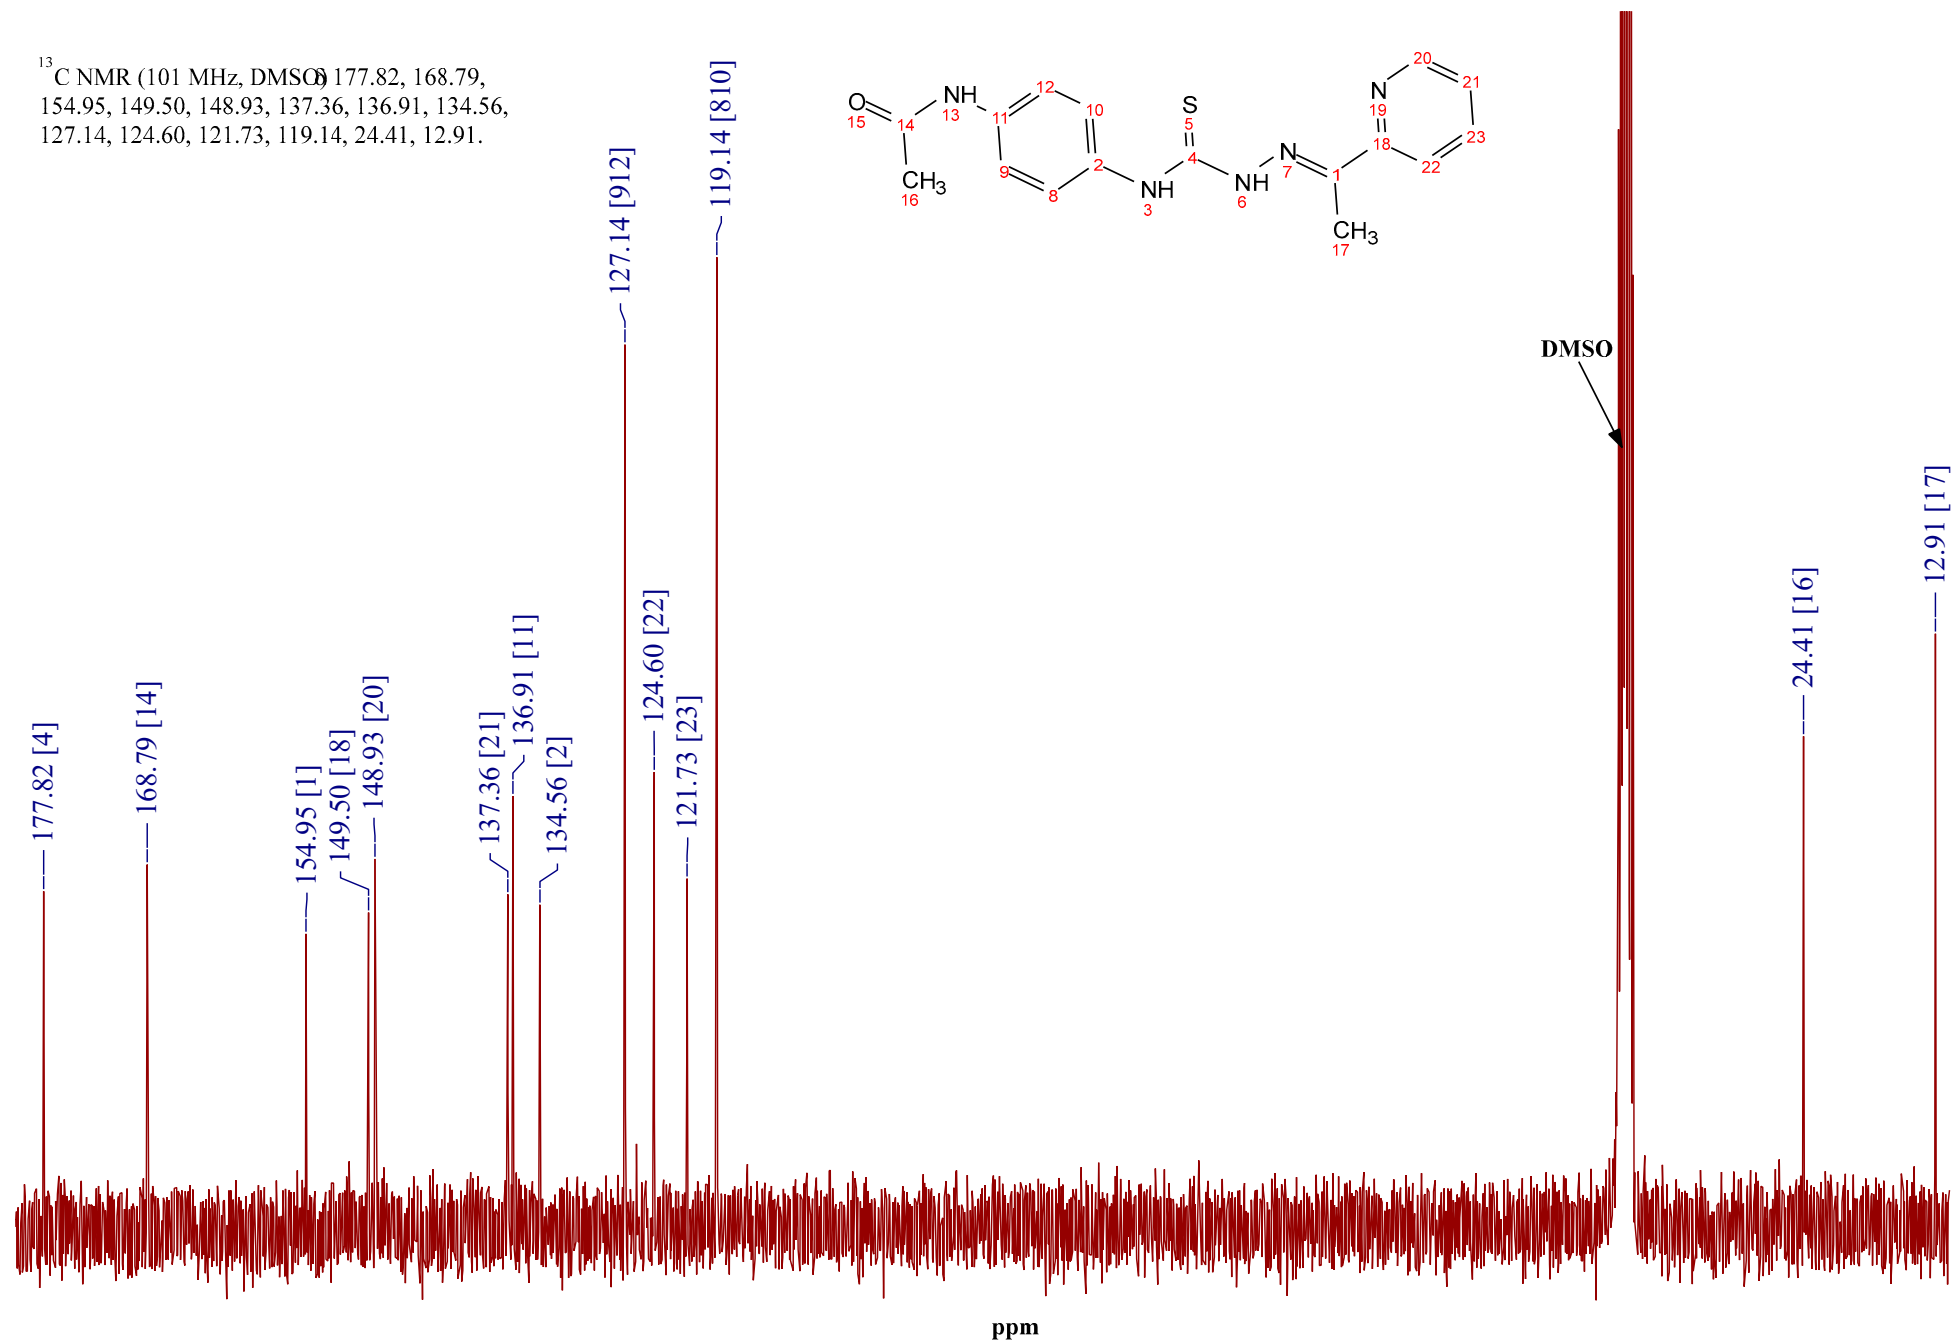

Figure S2.  $^{13}\text{C}$ -NMR spectrum of thiosemicarbazone HL

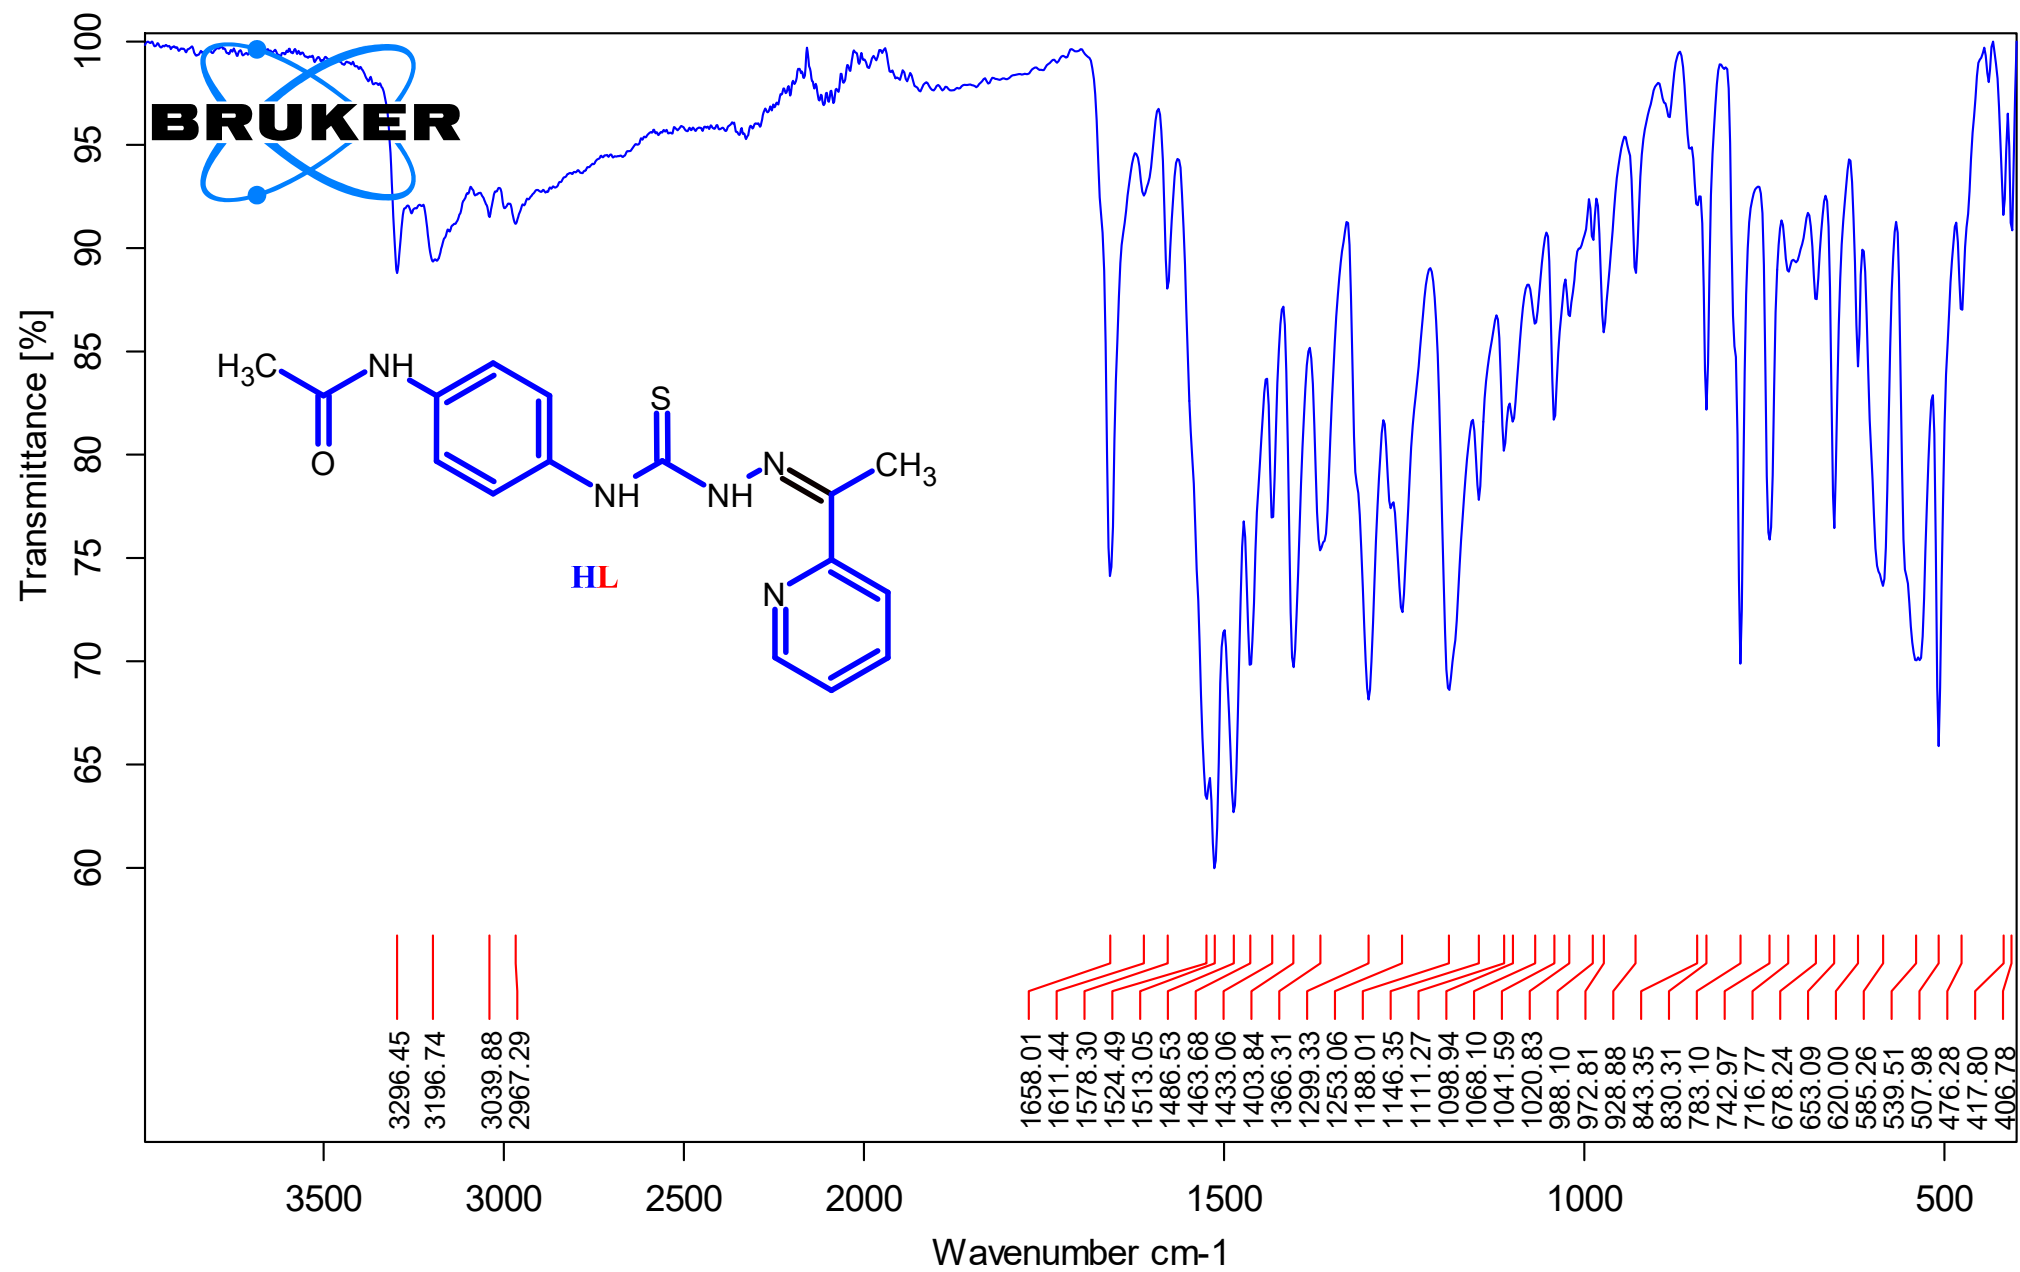

Figure S3. FT-IR spectrum of **HL**

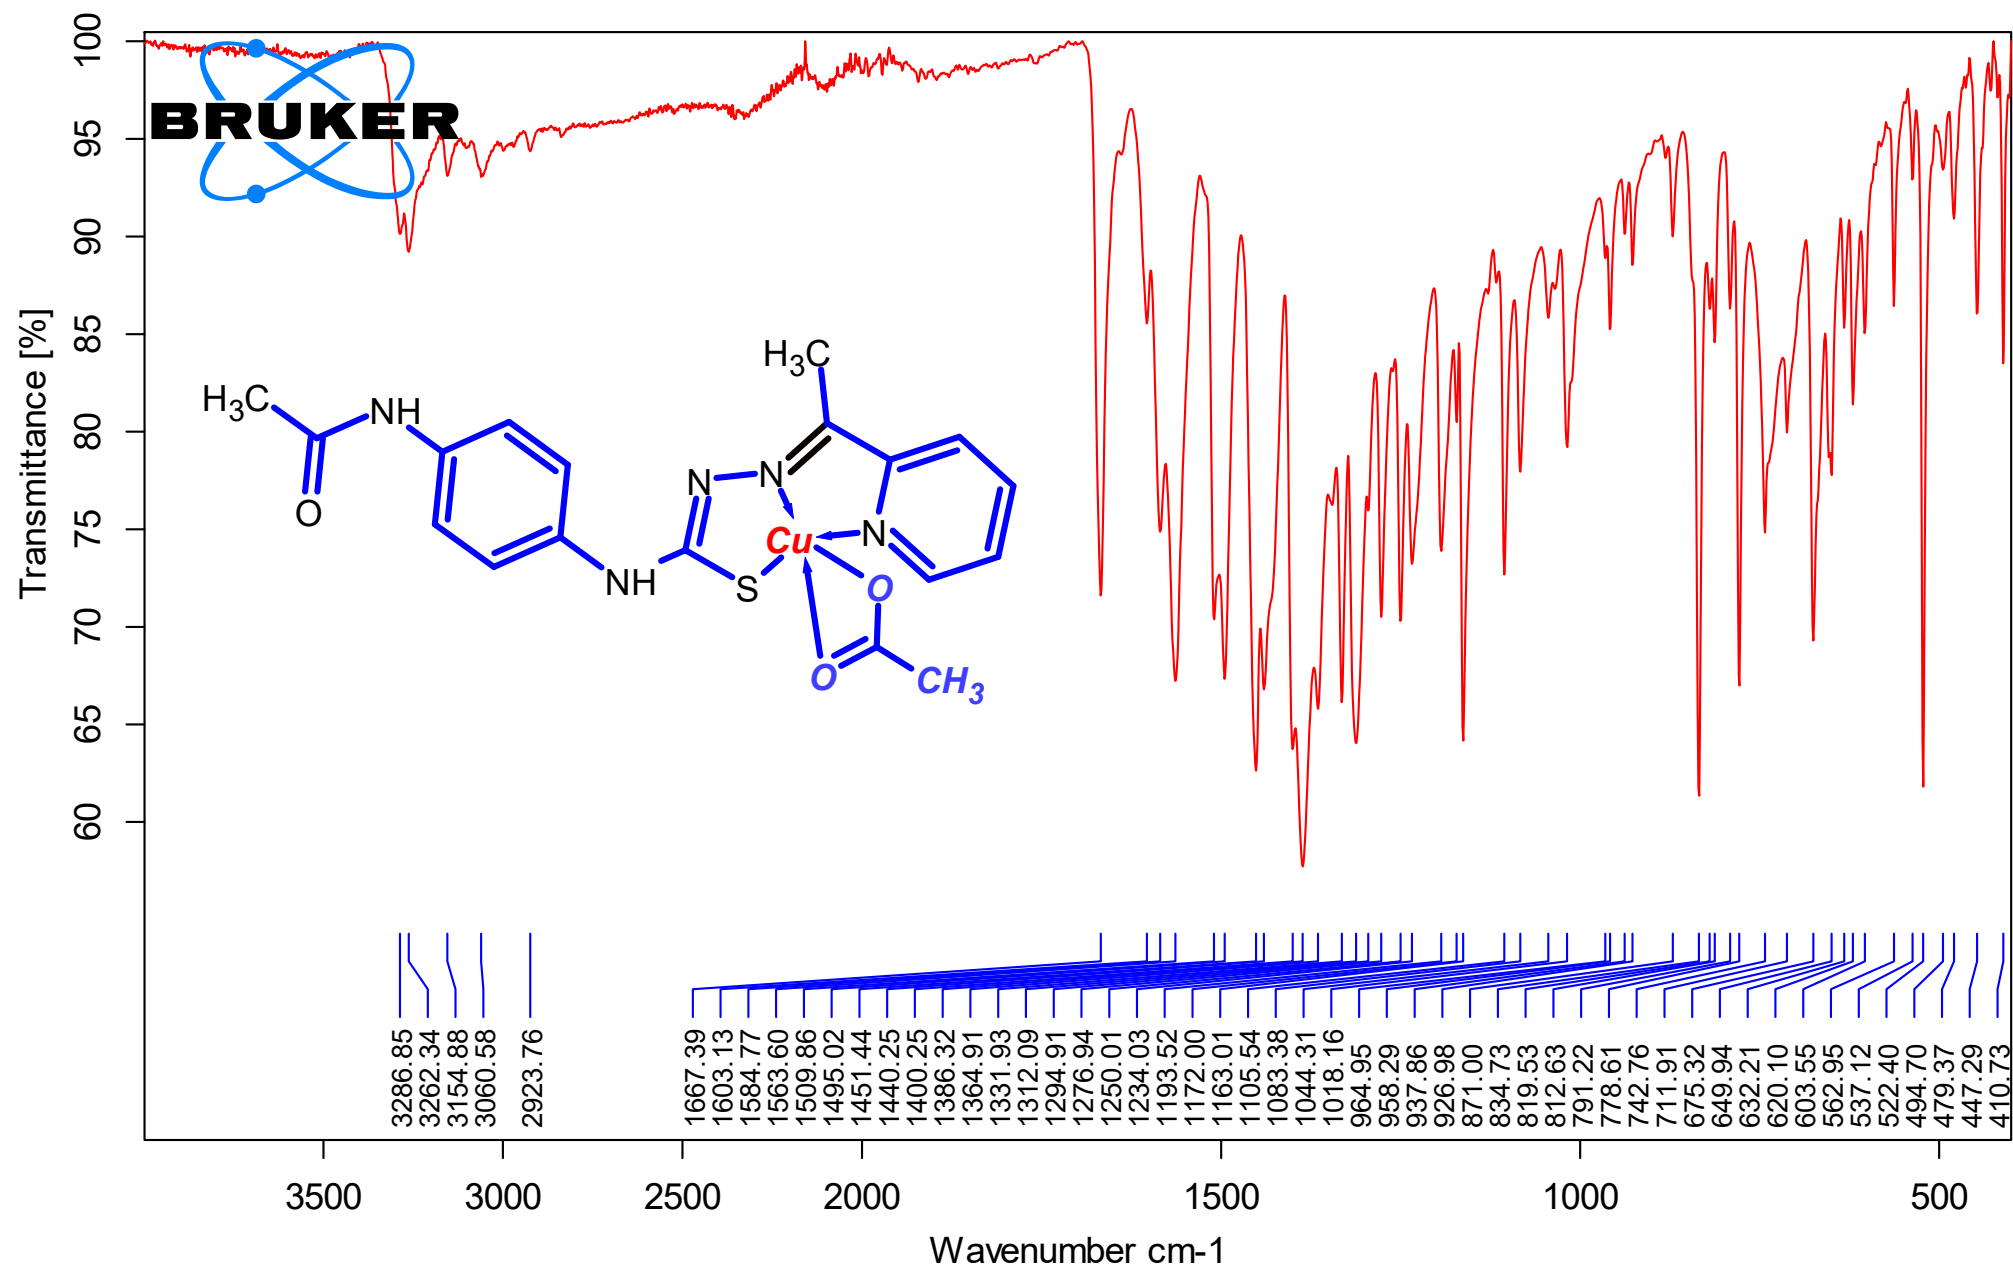

Figure S4. FT-IR spectrum of the coordination compound  $[Cu(L)CH_3COO]$  (1)

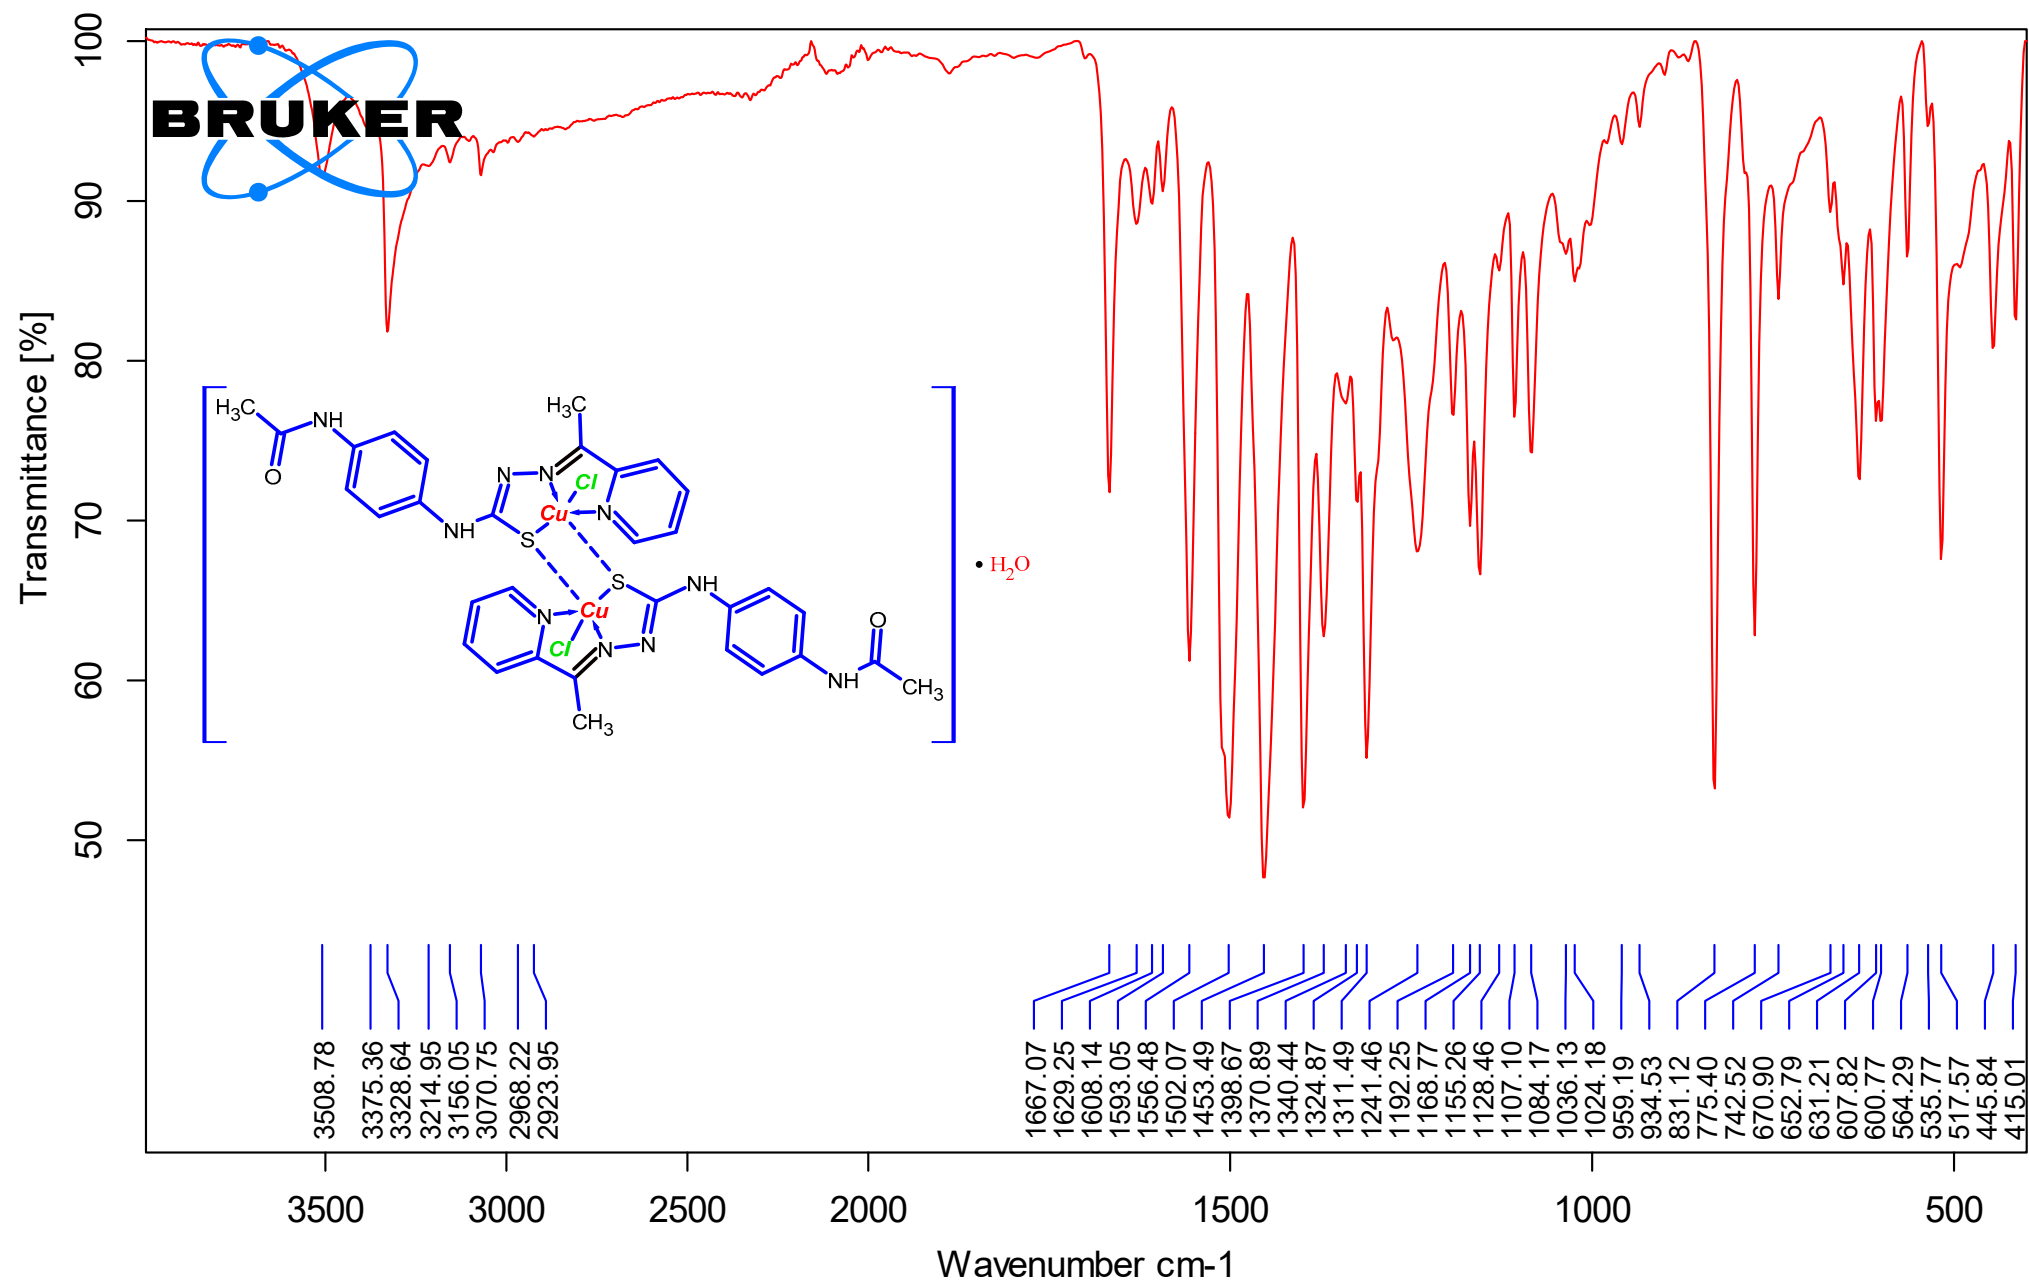

Figure S5. FT-IR spectrum of the coordination compound  $[\text{Cu}(\text{L})\text{Cl}]_2 \cdot 2\text{H}_2\text{O}$  (2)

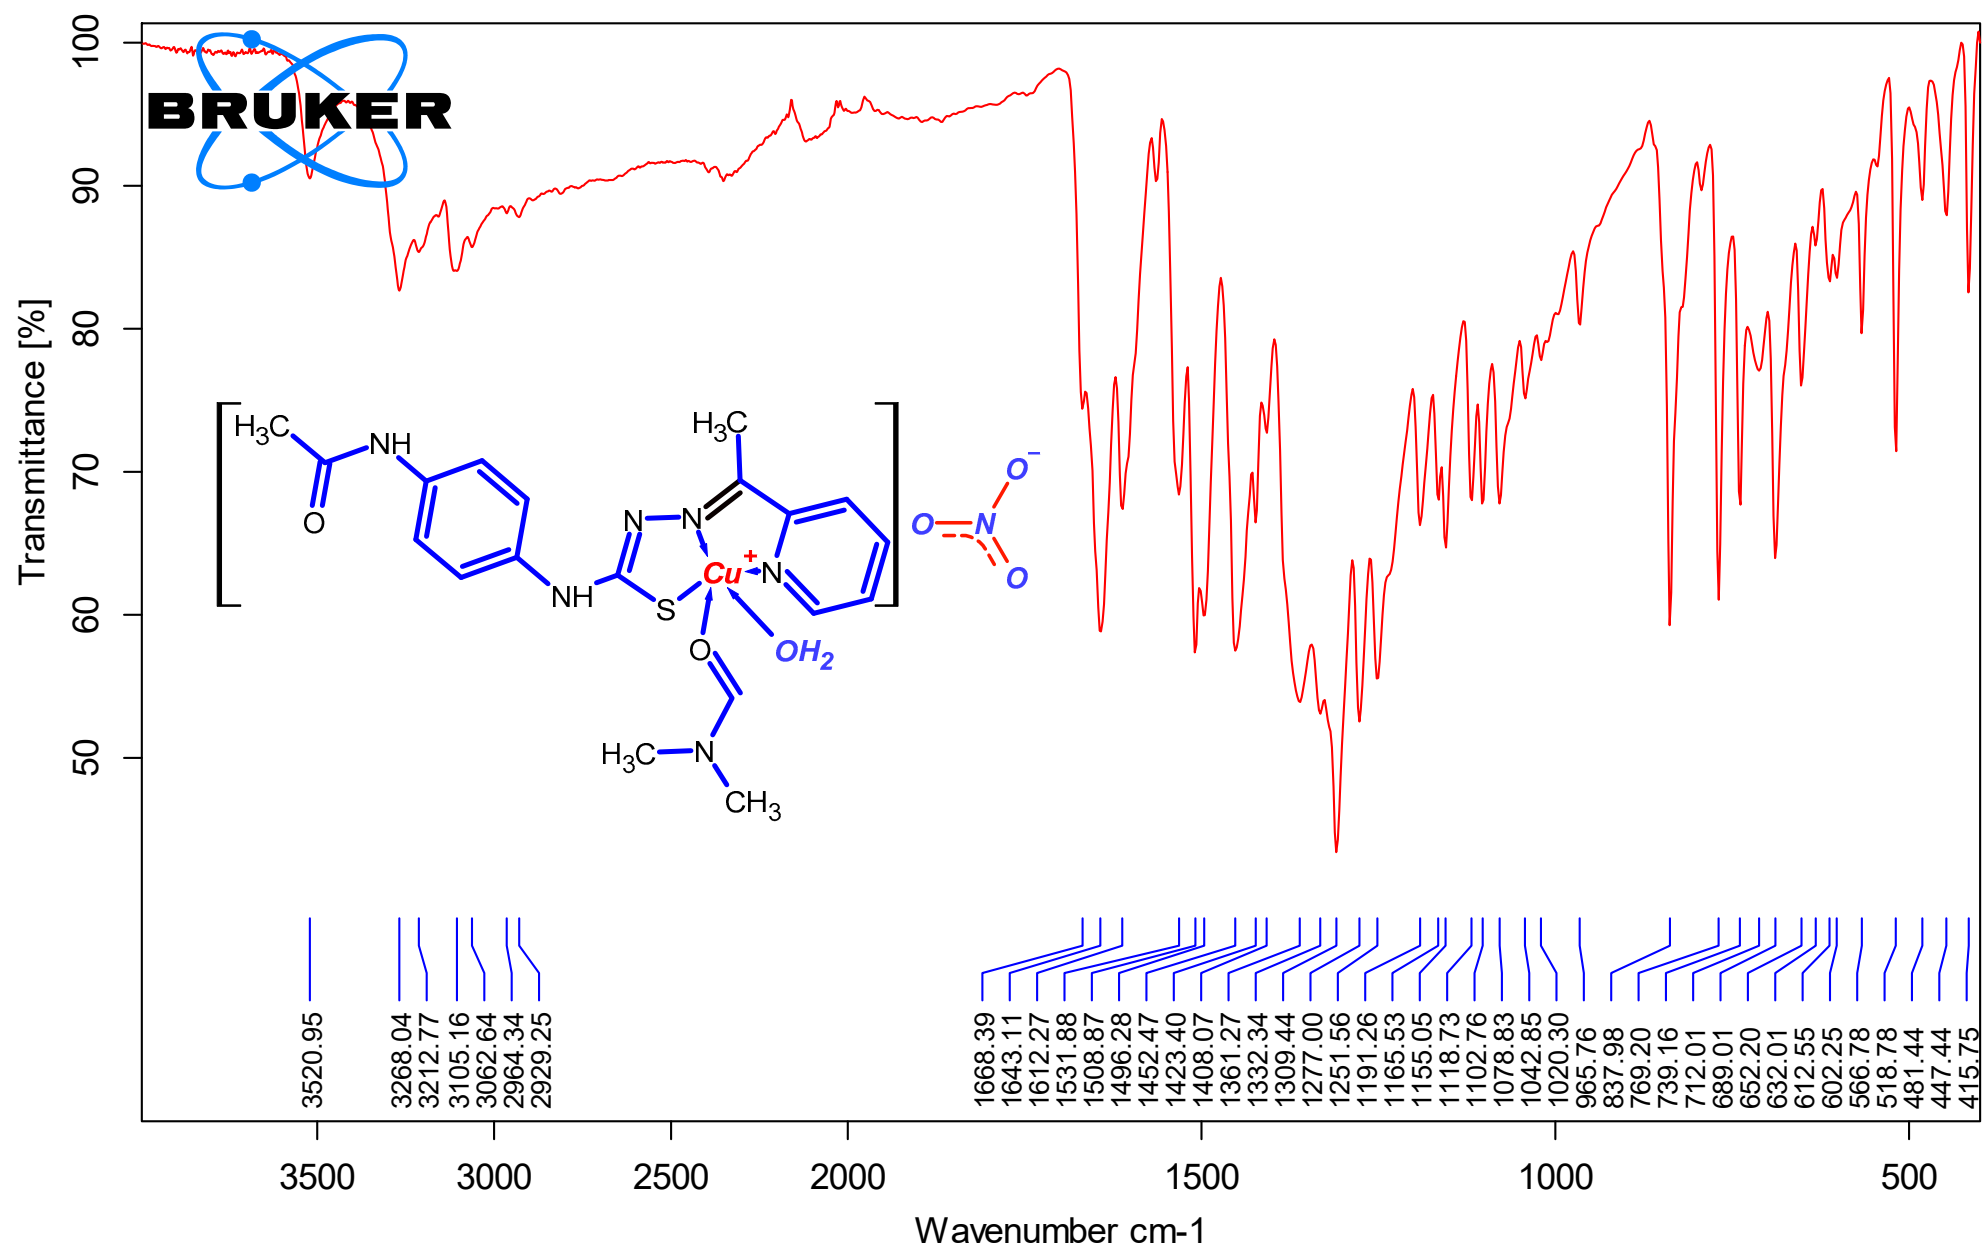

Figure S6. FT-IR spectrum of the coordination compound  $[\text{Cu}(\text{L})(\text{H}_2\text{O})(\text{DMF})]\text{NO}_3$  (3)

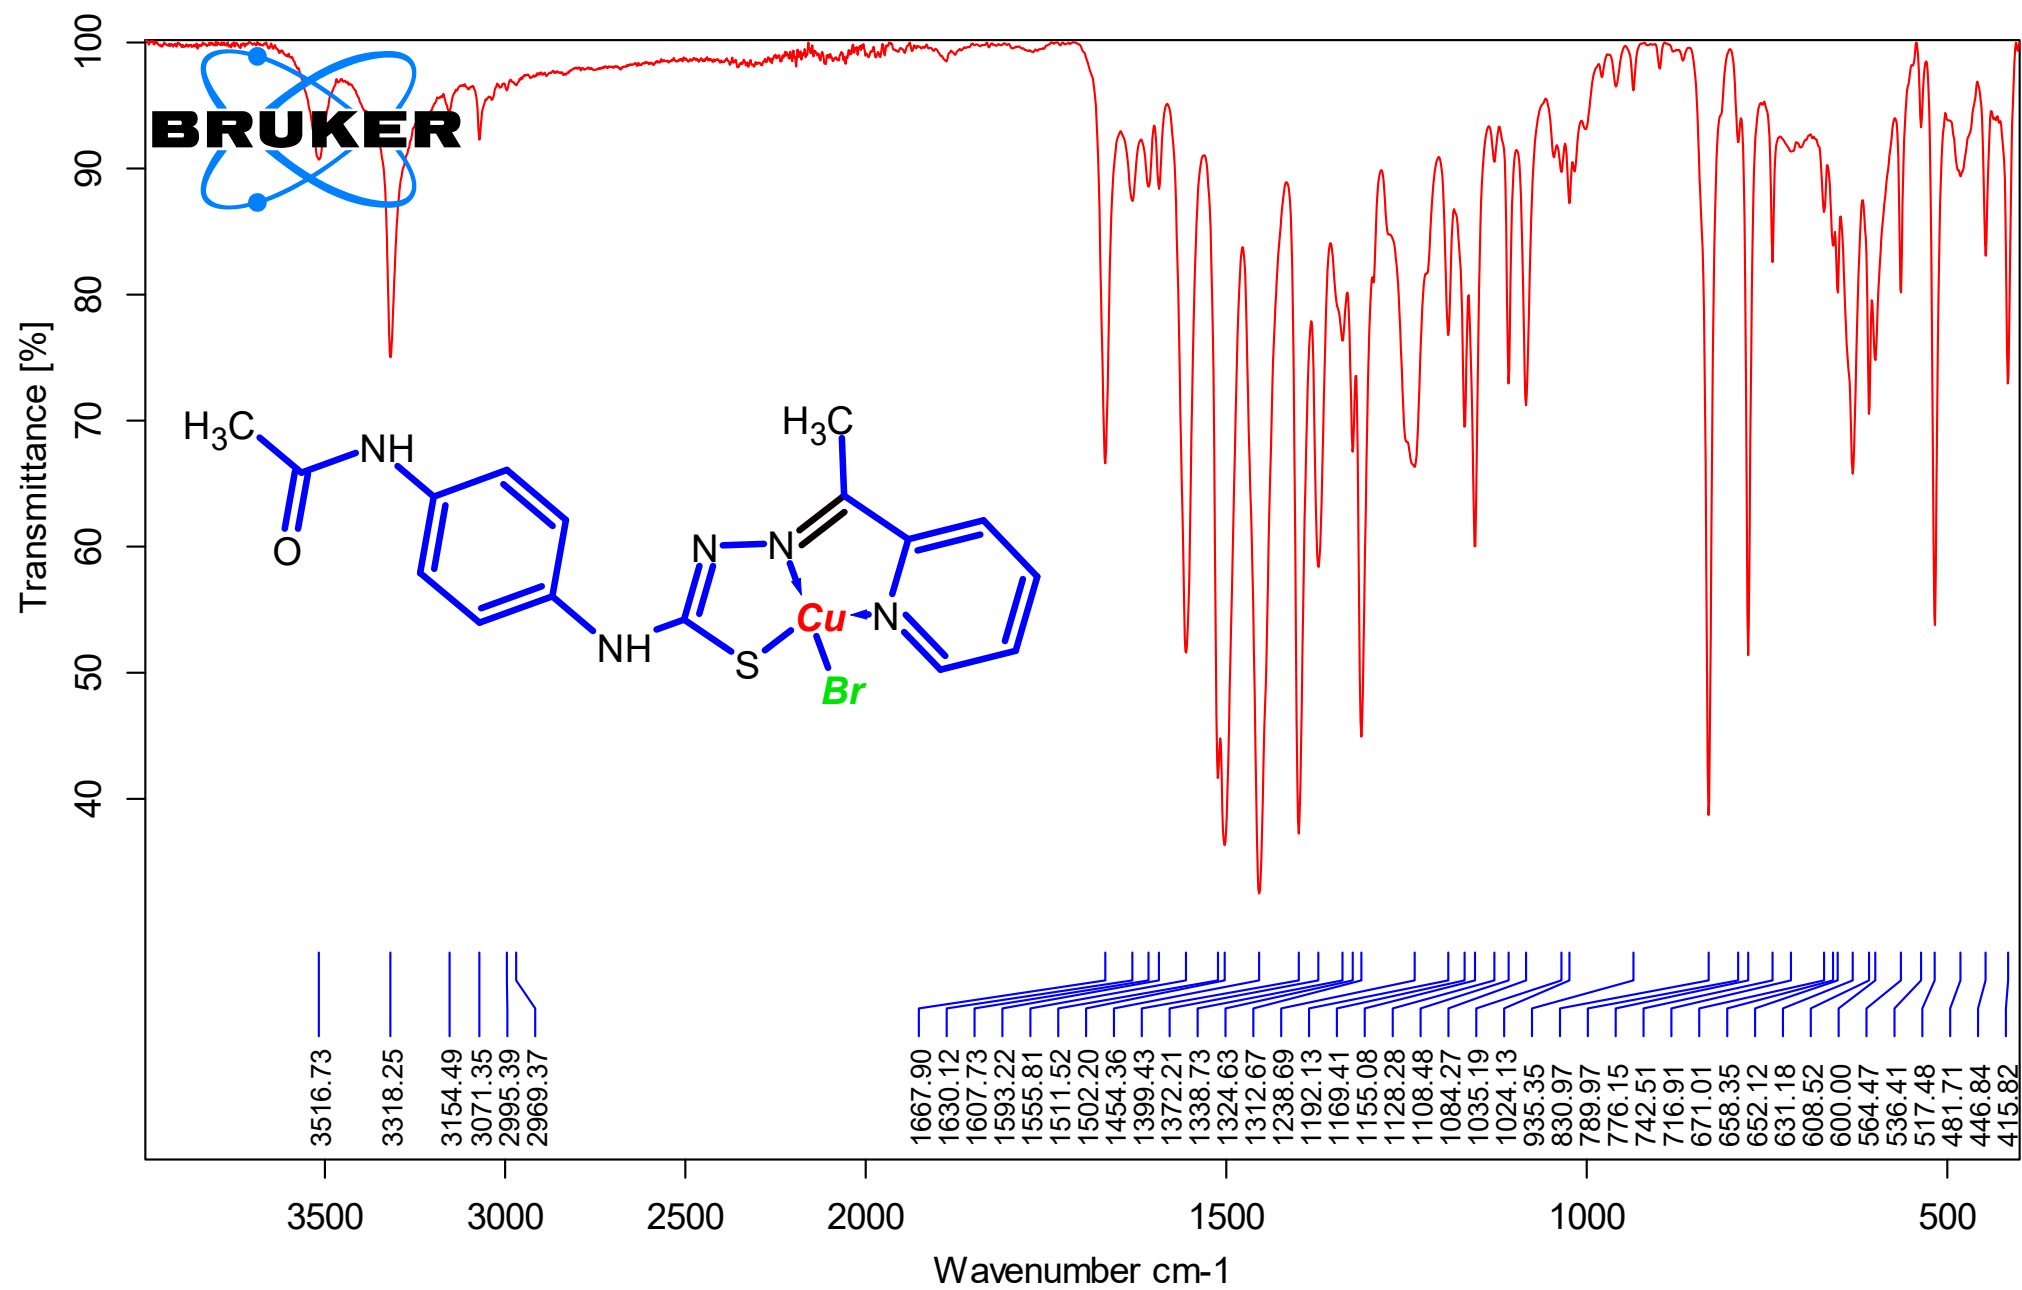

Figure S7. FT-IR spectrum of the coordination compound  $[\text{Cu}(\text{L})\text{Br}]$  (4)

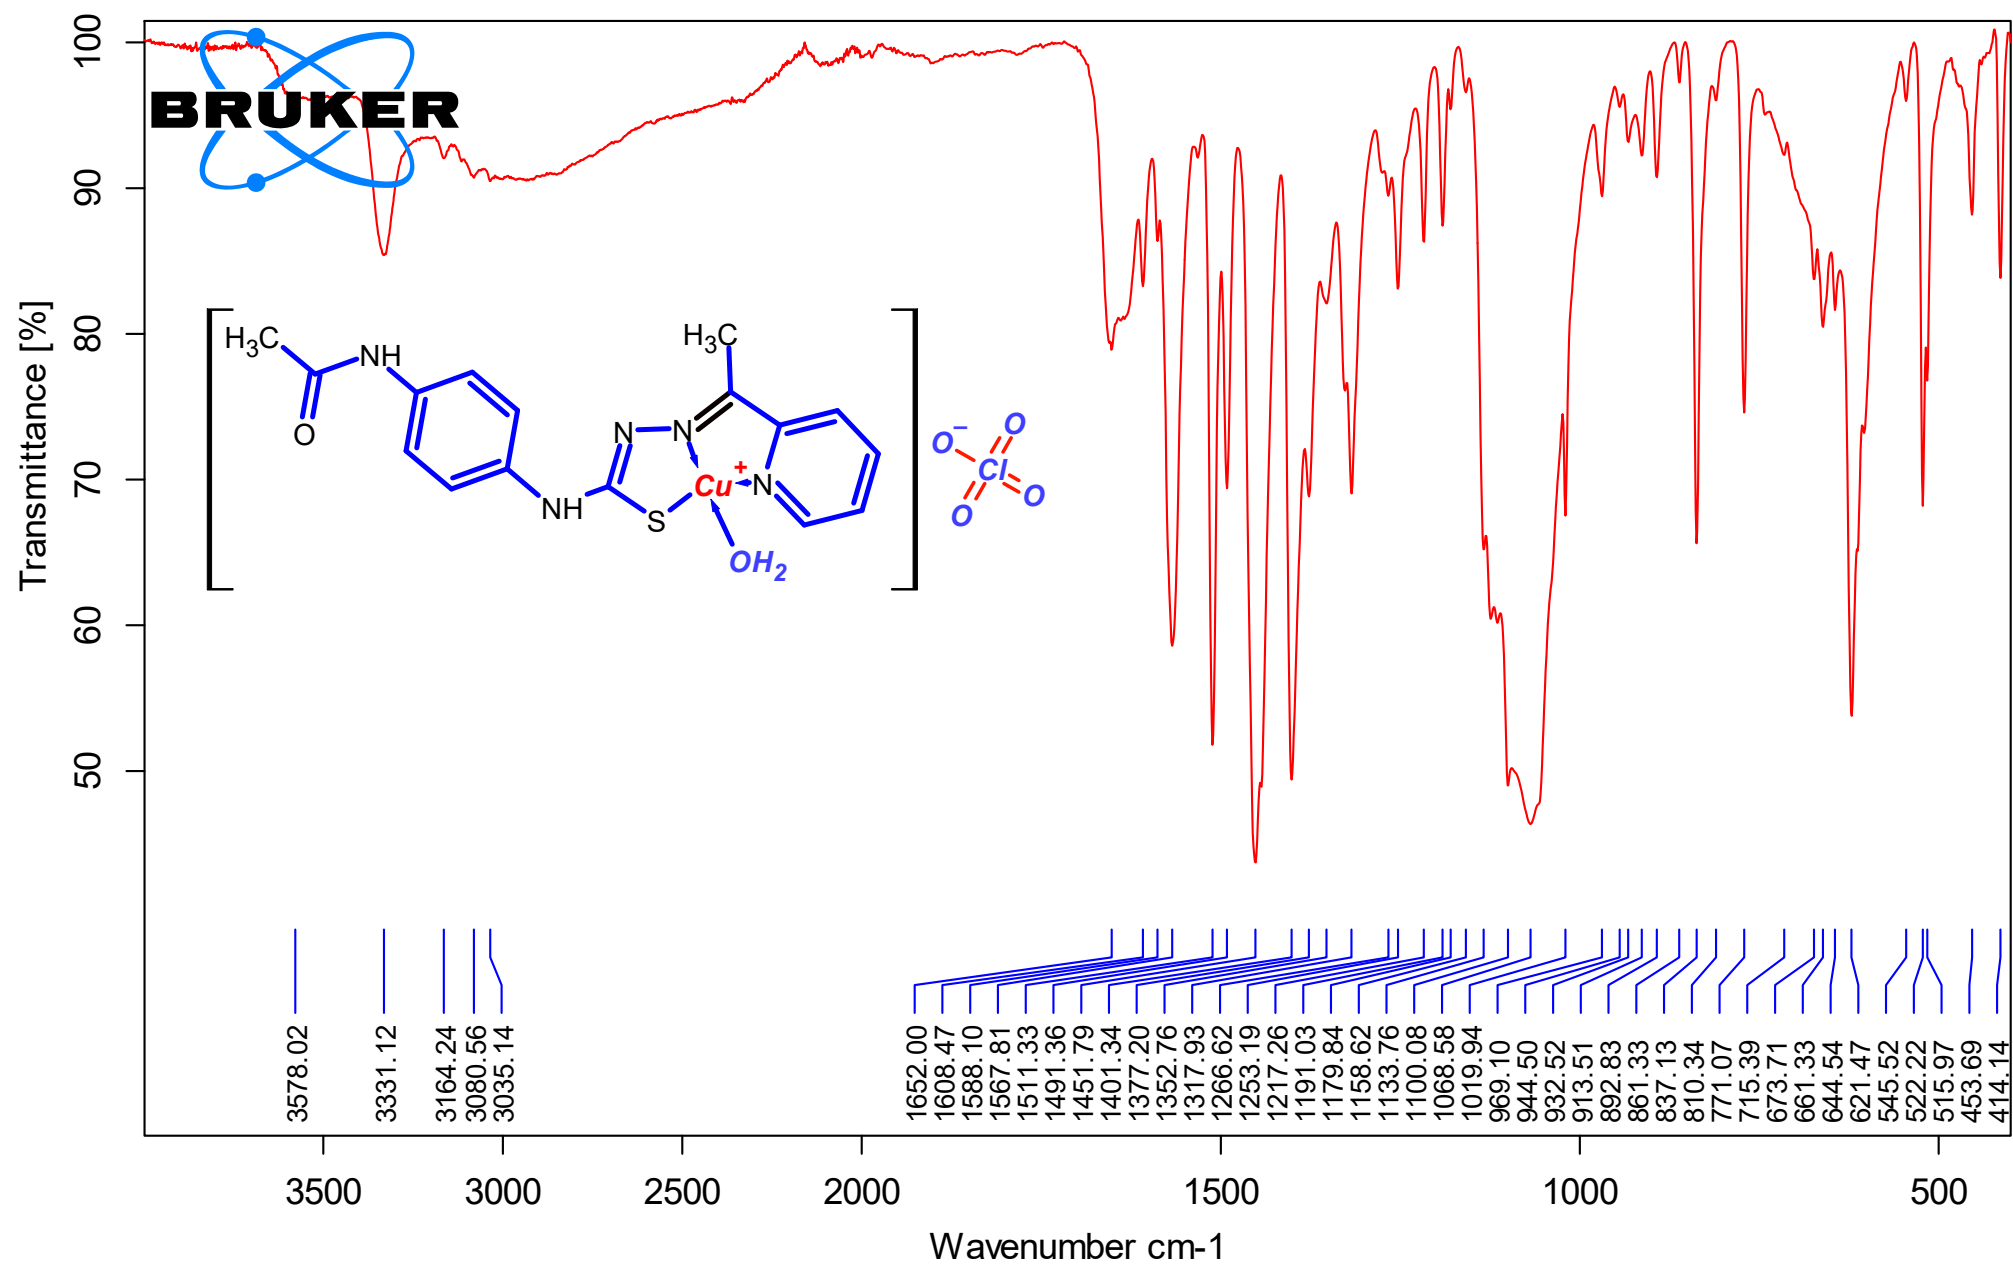

Figure S8. FT-IR spectrum of the coordination compound  $[Cu(L)(H_2O)]ClO_4$  (5)



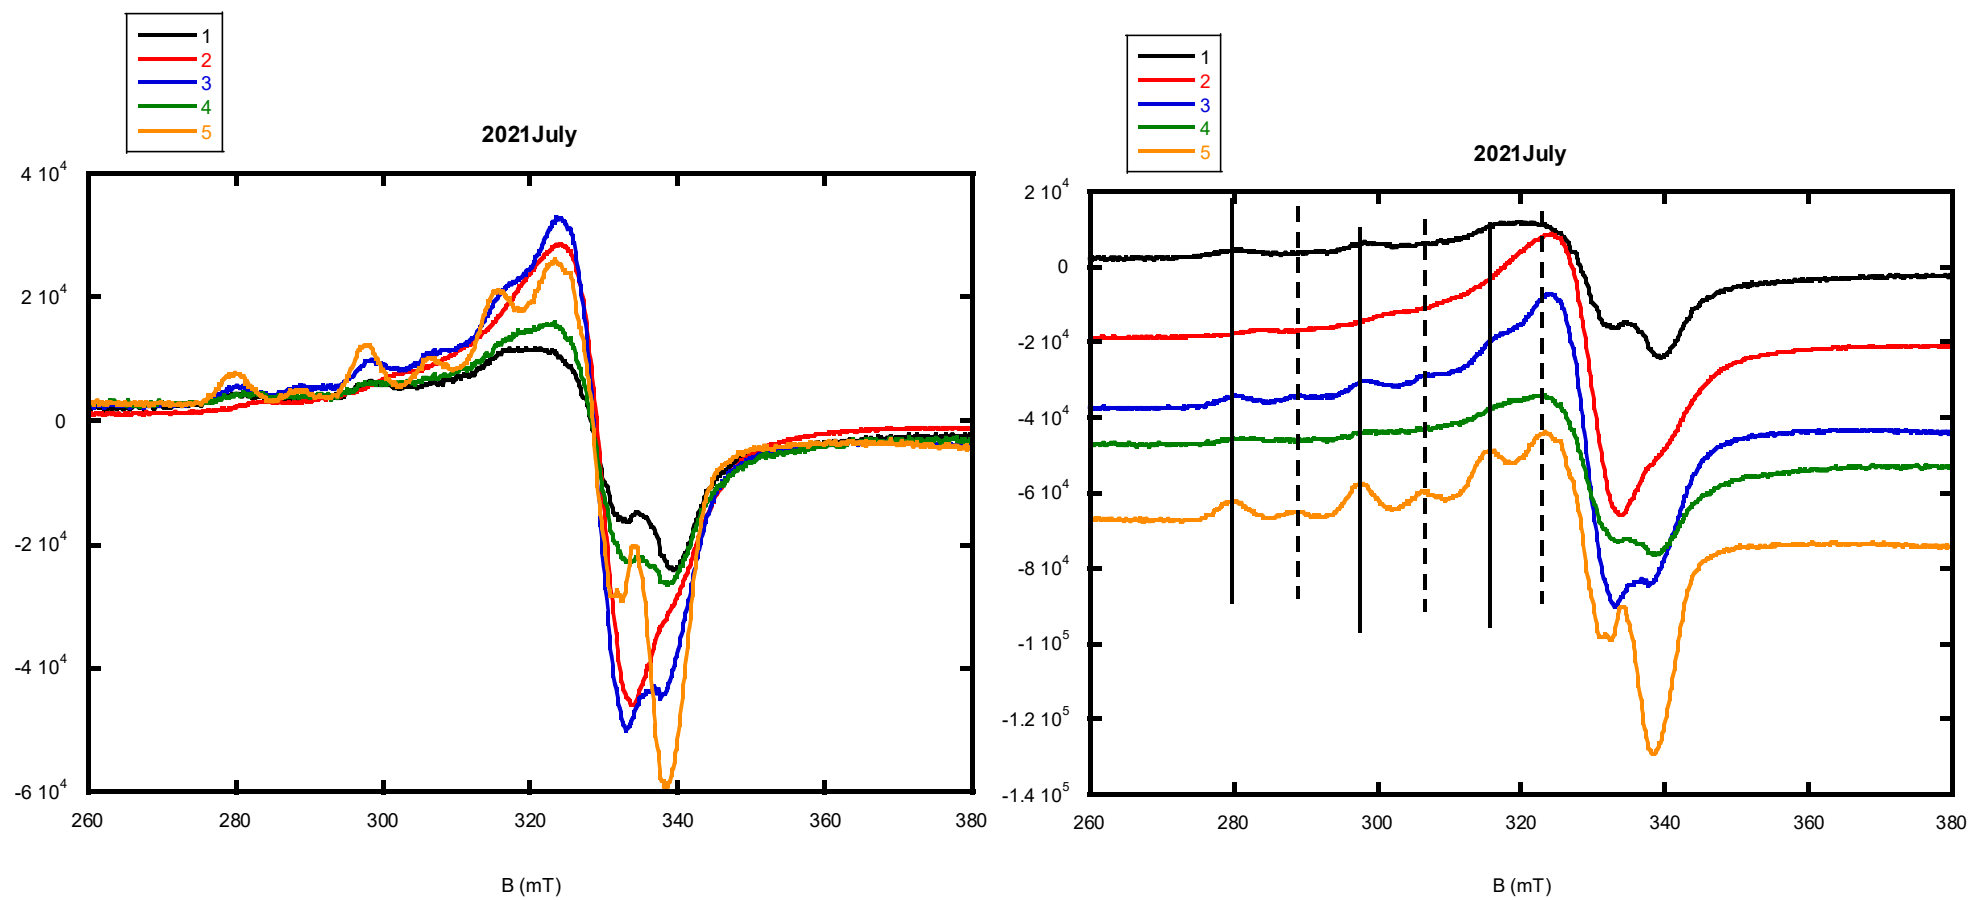

**Figure S9.** RES spectrum of the coordination compound (1-5)
